# Supplementary material for: A Single Fluorescent Protein-Based Indicator with a Time-Resolved Fluorescence Readout for Precise pH Measurements in the Alkaline Range
Source: MDPI journal article supplement (doi:10.3390/ijms232112907), 2022-10-26
Supplement: s1 [file s1]

## Supplementary materials

### Single fluorescent protein-based indicator with time-resolved fluorescence readout for precise pH-measurements in alkaline range

T.R. Simonyan, E.A. Protasova, A.V. Mamontova, A.M. Shakhov, K.A. Lukyanov, E.G. Maksimov, A.M. Bogdanov

**Supplementary table S1.** Fluorescence decay kinetics of EGFP-Y145L/S205V fitted by a biexponential model, recorded at various pH values upon excitation with a 450 nm picosecond and a 490 nm femtosecond laser.

|      | Ex 450 nm/Ex 490 nm |                    |               |                    |           |
|------|---------------------|--------------------|---------------|--------------------|-----------|
| pH   | $\tau_1$ , ps       | A <sub>1</sub> , % | $\tau_2$ , ps | A <sub>2</sub> , % | $\chi^2$  |
| 5.5  | 726/736             | 66/34              | 3345/2407     | 34/66              | 1.30/1.23 |
| 6.0  | 706/731             | 73/33              | 3054/2388     | 27/67              | 1.45/2.10 |
| 6.5  | 761/730             | 61/34              | 3351/2395     | 39/66              | 1.25/1.23 |
| 7.0  | 830/720             | 60/39              | 3163/2389     | 40/61              | 1.13/1.20 |
| 7.5  | 942/736             | 57/41              | 3172/2411     | 43/59              | 1.19/1.18 |
| 8.0  | 969/746             | 52/42              | 2799/2419     | 48/58              | 1.21/1.03 |
| 8.5  | 1069/766            | 53/42              | 2883/2438     | 47/58              | 1.18/1.13 |
| 9.0  | 1103/738            | 51/42              | 2778/2419     | 49/58              | 1.23/1.10 |
| 9.5  | 1195/750            | 49/42              | 2820/2452     | 51/58              | 1.21/1.14 |
| 10.0 | 1298/778            | 47/40              | 2921/2522     | 53/60              | 1.16/1.14 |

$\tau$  is the fluorescence lifetime of the corresponding exponential component; A is a relative contribution (amplitude) of the exponential decay component;  $\chi^2$  is the Pearson criterion, which characterizes the goodness of exponential fitting.

(A)

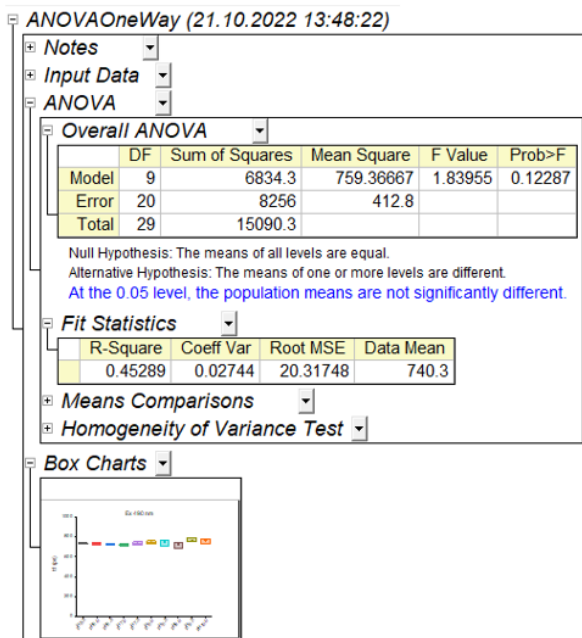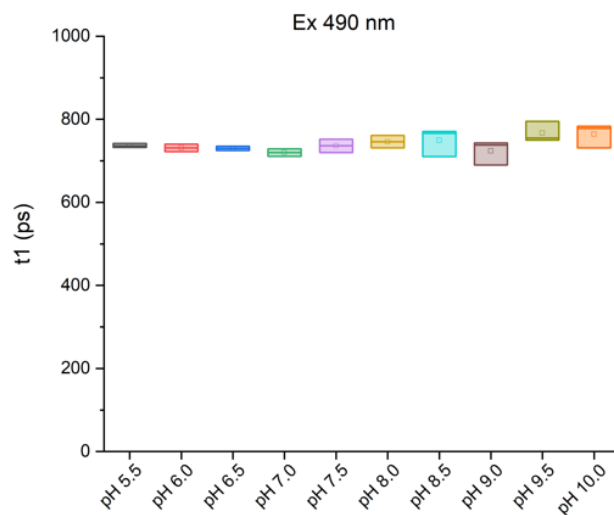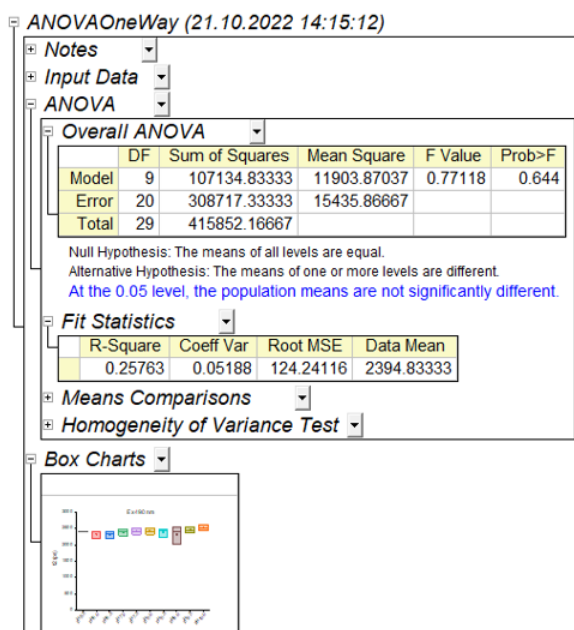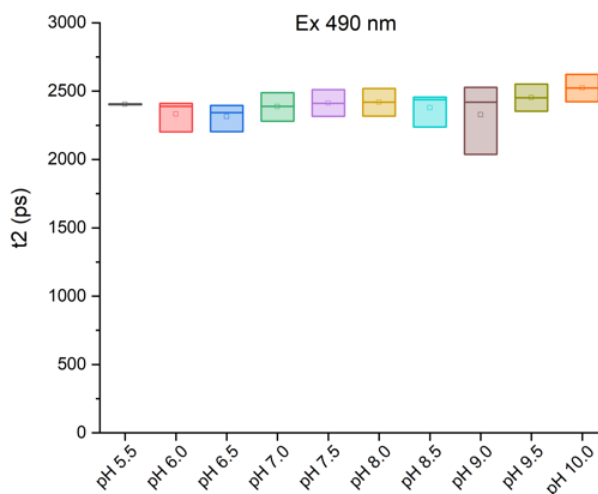

(B)

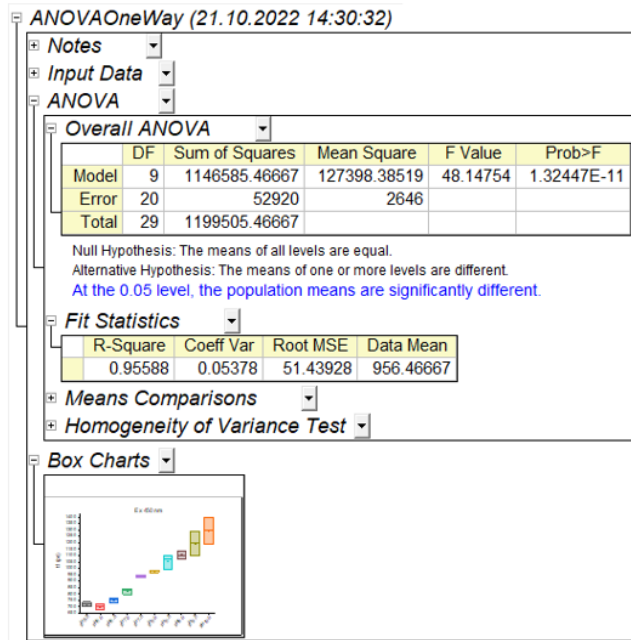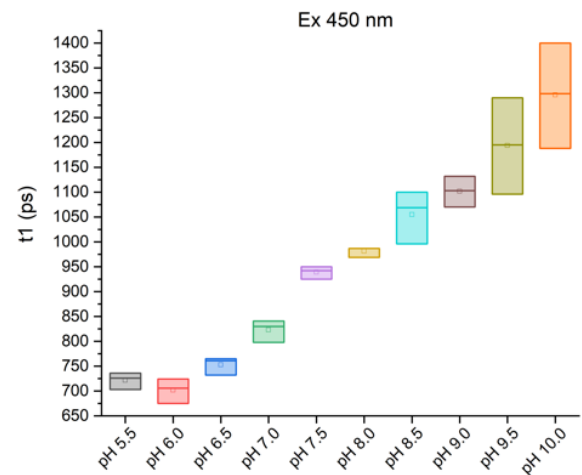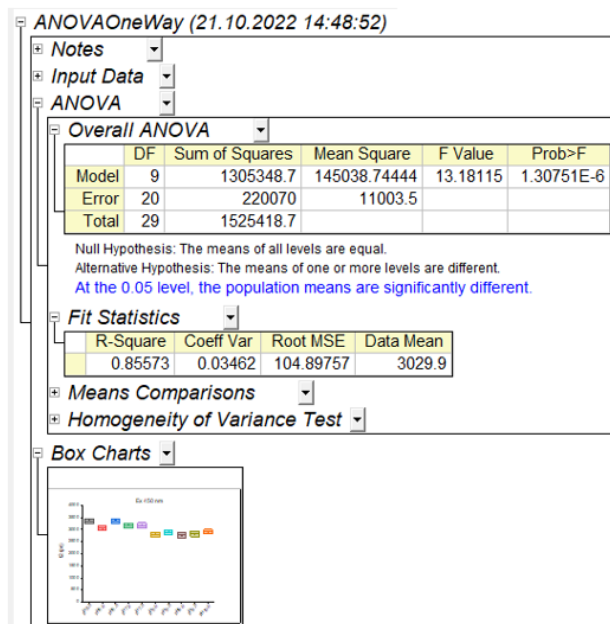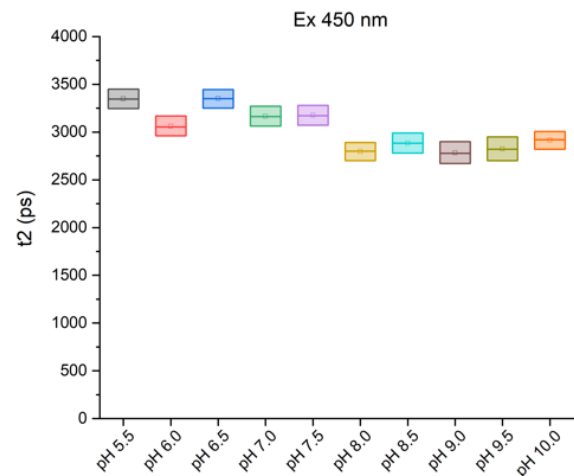

**Supplementary Figure S1.** Statistical analysis of the fluorescence decay data represented in Fig.1 and Suppl. table 1. Oneway ANOVA test ( $p < 0.05$ ) (from the Origin2022b package) was used to analyze the data. (A) Both fluorescent populations ( $t_1$  and  $t_2$ ) recorded at 490 nm excitation showed not significant difference. (B) Both fluorescent populations ( $t_1$  and  $t_2$ ) recorded at 450 nm excitation showed significant difference.

### Ex 490 nm

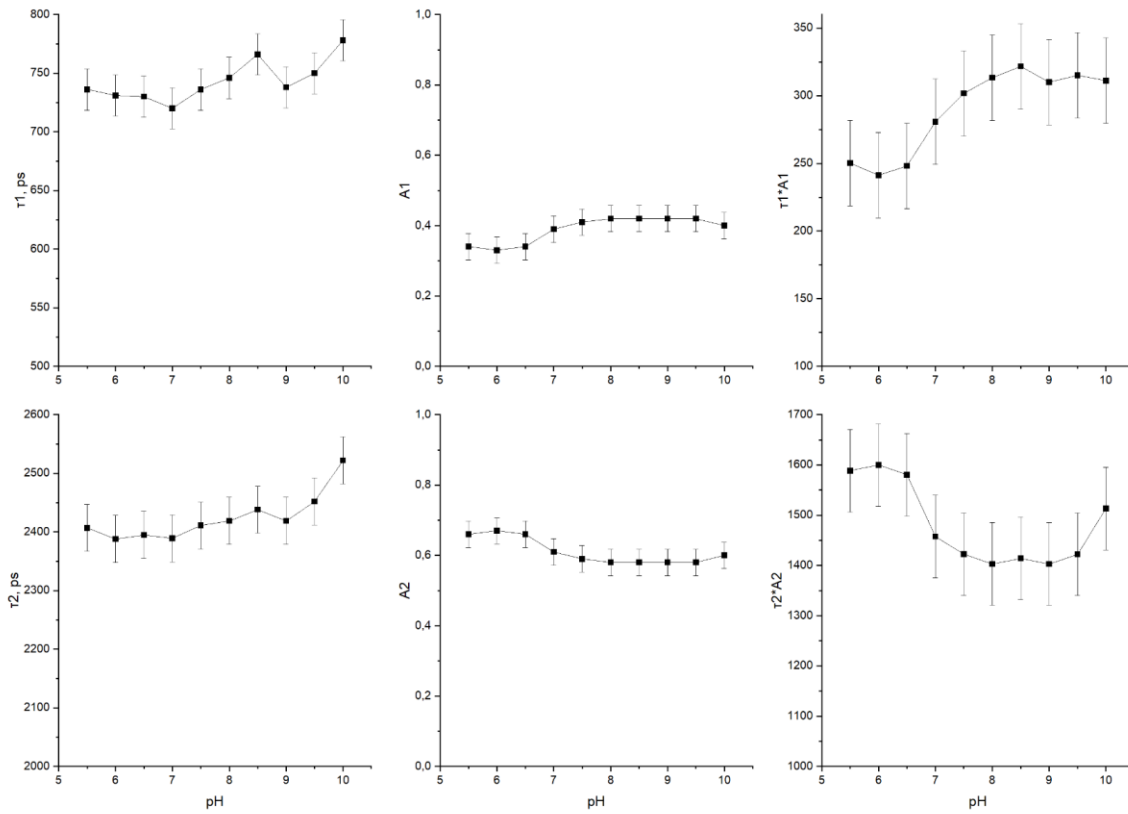

**Supplementary figure S2.** Fluorescence decay kinetics of EGFP-Y145L/S205V fitted by a biexponential model, recorded at various pH values upon excitation with a 490 nm femtosecond laser.  $\tau$  is the fluorescence lifetime of the corresponding exponential component ( $\tau_1$ —lifetime of the short-lived component,  $\tau_2$ —lifetime of the long-lived component);  $A$  is a relative contribution (amplitude) of the exponential decay component ( $A_1$ —contribution of the short-lived component,  $A_2$ —contribution of the long-lived component);  $\tau \cdot A$  is an amplitude-normalized lifetime (given in a.u.). Standard errors of mean (S.E.M.) are shown for each data point (n = 3).

## Ex 450 nm

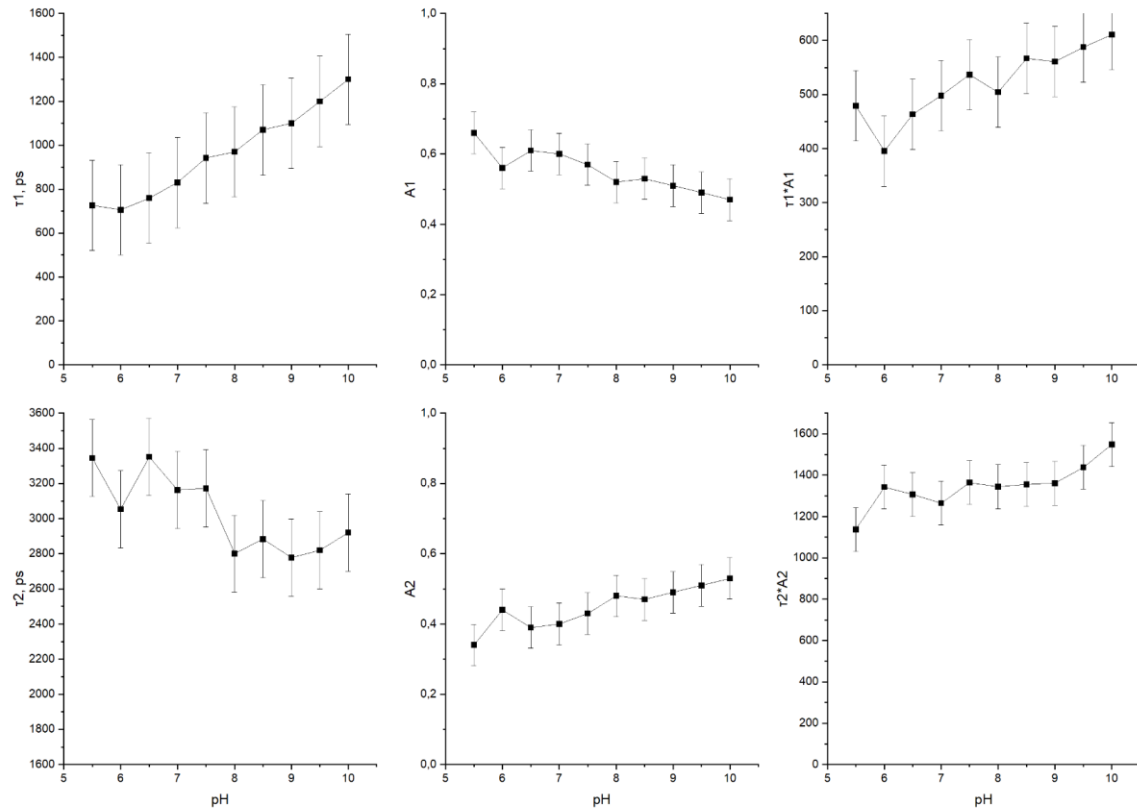

**Supplementary figure S3.** Fluorescence decay kinetics of EGFP-Y145L/S205V fitted by a biexponential model, recorded at various pH values upon excitation with a 450 nm picosecond laser.  $\tau$  is the fluorescence lifetime of the corresponding exponential component ( $\tau_1$ —lifetime of the short-lived component,  $\tau_2$ —lifetime of the long-lived component);  $A$  is a relative contribution (amplitude) of the exponential decay component ( $A_1$ —contribution of the short-lived component,  $A_2$ —contribution of the long-lived component);  $\tau \cdot A$  is an amplitude-normalized lifetime (given in a.u.). Standard errors of mean (S.E.M.) are shown for each data point ( $n = 3$ ).

## Ex 2P 750 nm

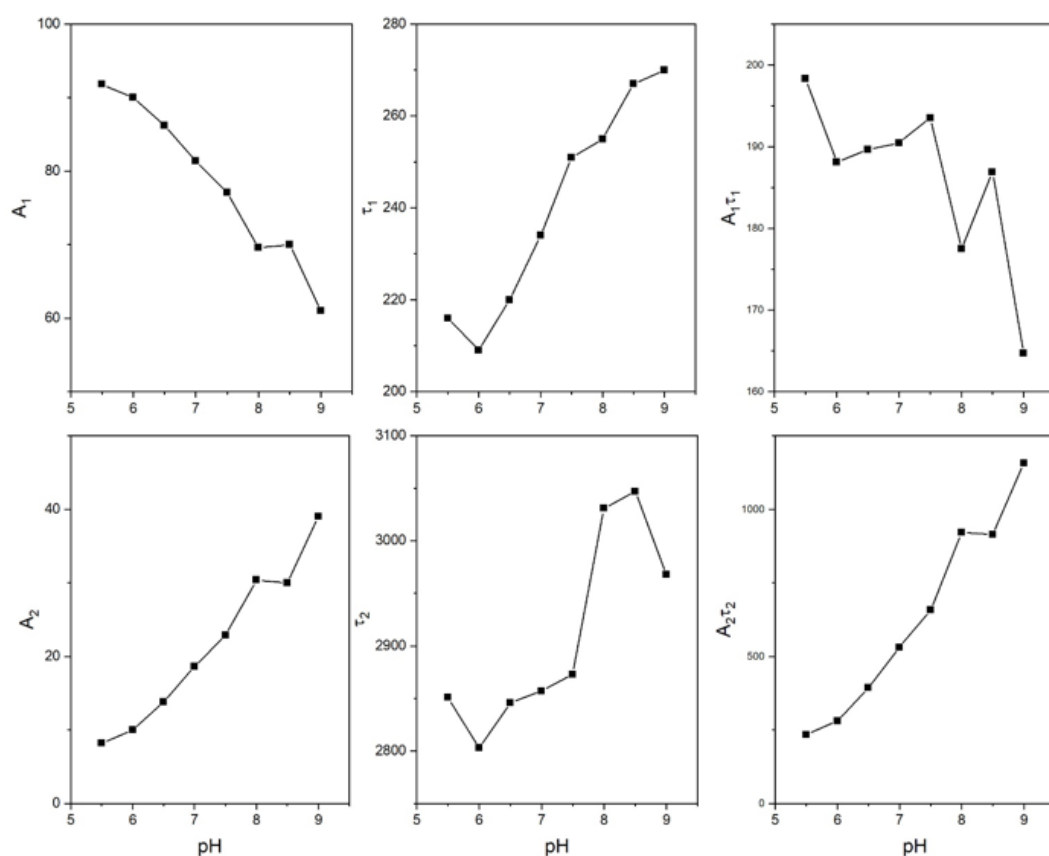

**Supplementary figure S4.** Fluorescence decay kinetics of EGFP-Y145L/S205V fitted by a biexponential model, recorded at various pH values upon two-photon excitation with a 750 nm femtosecond laser.  $\tau$  is the fluorescence lifetime of the corresponding exponential component ( $\tau_1$ —lifetime of the short-lived component,  $\tau_2$ —lifetime of the long-lived component);  $A$  is a relative contribution (amplitude) of the exponential decay component ( $A_1$ —contribution of the short-lived component,  $A_2$ —contribution of the long-lived component);  $\tau \cdot A$  is an amplitude-normalized lifetime (given in a.u.).
